# Supplementary material
Source: PubMed Central journal article supplement (PMC3128506)
Supplement: mmc2.pdf [file mmc2.pdf]

Table S2.

The in silico mean mRNA expression of central AA pathway genes in prostate cancer, healthy prostate and all available normal tissues combined.

Fold change and the significance (p-value) of the expression level difference between prostate cancer and normal prostate or prostate cancer and all normal tissues <sup>a</sup> indicated.

| Gene           |                                                             | ensg_id         | Tissue               | normal n | cancer n | normal mean | cancer mean | fold change (FC)   | p-value           |
|----------------|-------------------------------------------------------------|-----------------|----------------------|----------|----------|-------------|-------------|--------------------|-------------------|
| PAFAH1B1       | Platelet-activating factor acetylhydrolase IB subunit alpha | ENSG00000007168 | prca vs. all normals | 1502     | 329      | 963,4521318 | 614,0557872 | 0,637349555        | <b>9,38E-94</b>   |
| <b>PLA2G2A</b> | Phospholipase A2, group IIA                                 | ENSG00000188257 | prca vs. all normals | 1502     | 329      | 1038,238703 | 5105,726778 | <b>4,917681033</b> | <b>3,09E-55</b>   |
| <b>EPHX2</b>   | Epoxide hydrolase 2                                         | ENSG00000120915 | prca vs. all normals | 1502     | 329      | 312,0897525 | 840,7379292 | <b>2,693897901</b> | <b>4,09E-53</b>   |
| <b>FAAH</b>    | Fatty acid amide hydrolase                                  | ENSG00000117480 | prca vs. all normals | 1502     | 329      | 447,845267  | 794,7888523 | <b>1,774695215</b> | <b>1,45E-51</b>   |
| <b>PLA2G7</b>  | Phospholipase A2, group VII                                 | ENSG00000146070 | prca vs. all normals | 1502     | 329      | 147,0058053 | 579,8321125 | <b>3,944280372</b> | <b>9,15E-45</b>   |
| <b>ALOX15B</b> | 15-lipoxygenase 2                                           | ENSG00000179593 | prca vs. all normals | 1502     | 329      | 257,9321661 | 819,2249897 | <b>3,176125731</b> | <b>6,83E-38</b>   |
| PNPLA3         | Patatin-like phospholipase domain containing 3              | ENSG00000100344 | prca vs. all normals | 1208     | 66       | 116,7193797 | 49,59731364 | 0,424927838        | <b>2,56E-26</b>   |
| ALOX5          | 5-lipoxygenase                                              | ENSG00000012779 | prca vs. all normals | 1502     | 329      | 452,1764998 | 276,056972  | 0,610507119        | <b>2,79E-21</b>   |
| PLA2G4B        | Phospholipase A2, group IVB                                 | ENSG00000168970 | prca vs. all normals | 1084     | 66       | 716,9442629 | 527,9614697 | 0,736405181        | <b>4,76E-20</b>   |
| PLA2G4C        | Phospholipase A2, group IVC                                 | ENSG00000105499 | prca vs. all normals | 1502     | 329      | 635,0591036 | 467,1265711 | 0,735563932        | <b>4,66E-19</b>   |
| PLA2G6         | Phospholipase A2, group VII                                 | ENSG00000184381 | prca vs. all normals | 1502     | 329      | 401,8848187 | 302,4725562 | 0,75263494         | <b>5,36E-18</b>   |
| PAFAH1B2       | Platelet-activating factor acetylhydrolase IB subunit beta  | ENSG00000168092 | prca vs. all normals | 1084     | 66       | 230,9484679 | 131,3437591 | 0,568714572        | <b>4,68E-15</b>   |
| ALOX12         | 12-lipoxygenase                                             | ENSG00000108839 | prca vs. all normals | 1502     | 329      | 198,782033  | 142,4496012 | 0,716612055        | <b>7,92E-14</b>   |
| PLA2G10        | Phospholipase A2, group X                                   | ENSG00000069764 | prca vs. all normals | 1502     | 329      | 197,1856985 | 122,1837418 | 0,619637949        | <b>1,37E-13</b>   |
| PTGS2          | Prostaglandin-endoperoxide synthase 2 (COX-2)               | ENSG00000073756 | prca vs. all normals | 1502     | 329      | 265,6504865 | 469,7278997 | 1,768217728        | <b>5,13E-13</b>   |
| PLA2G4A        | Phospholipase A2, group IVA                                 | ENSG00000116711 | prca vs. all normals | 1502     | 329      | 143,5039978 | 189,817287  | 1,3227317          | <b>3,84E-11</b>   |
| CYP2J2         | Cytochrome P450 2J2                                         | ENSG00000134716 | prca vs. all normals | 1502     | 329      | 392,4997611 | 290,443979  | 0,73998511         | <b>4,09E-11</b>   |
| CYP2C9         | Cytochrome P450 2C9                                         | ENSG00000138109 | prca vs. all normals | 1502     | 329      | 281,6682194 | 215,4017207 | 0,764735621        | <b>4,32E-09</b>   |
| PTGES3         | Prostaglandin E synthase 3                                  | ENSG00000110958 | prca vs. all normals | 1502     | 329      | 3917,126327 | 4481,046143 | 1,143962632        | <b>2,91E-08</b>   |
| PAFAH2         | Platelet-activating factor acetylhydrolase 2                | ENSG00000158006 | prca vs. all normals | 1502     | 329      | 200,9277265 | 230,7900131 | 1,148622203        | <b>5,39E-08</b>   |
| ALOX15         | 15-lipoxygenase                                             | ENSG00000161905 | prca vs. all normals | 1502     | 329      | 148,8578228 | 110,2872909 | 0,740890125        | <b>1,40E-07</b>   |
| PAFAH1B3       | Platelet-activating factor acetylhydrolase IB subunit gamma | ENSG00000079462 | prca vs. all normals | 1502     | 329      | 435,3342514 | 512,7975246 | 1,177939762        | <b>7,14E-07</b>   |
| PTGES2         | Prostaglandin E synthase 2                                  | ENSG00000148334 | prca vs. all normals | 1084     | 66       | 398,926715  | 299,8239273 | 0,751576457        | <b>8,40E-07</b>   |
| CYP2C8         | Cytochrome P450 2C8                                         | ENSG00000138115 | prca vs. all normals | 1502     | 329      | 112,5615253 | 93,56197863 | 0,831207452        | <b>4,14E-06</b>   |
| PLA2G4F        | Phospholipase A2, group IVF                                 | ENSG00000168907 | prca vs. all normals | 621      | 66       | 291,3947895 | 389,9707879 | 1,338290189        | <b>4,93E-06</b>   |
| <b>CYP4F8</b>  | Cytochrome P450 4F8                                         | ENSG00000186526 | prca vs. all normals | 1084     | 66       | 41,17989734 | 111,2718733 | <b>2,702092052</b> | <b>9,53E-05</b>   |
| ANXA2          | Annexin A2                                                  | ENSG00000182718 | prca vs. all normals | 1502     | 329      | 2572,604676 | 2159,868897 | 0,83956502         | <b>0,00013324</b> |
| <b>HPGD</b>    | Hydroxyprostaglandin dehydrogenase 15-(NAD)                 | ENSG00000164120 | prca vs. all normals | 1502     | 329      | 309,1000532 | 460,3100726 | 1,489194414        | <b>0,0002267</b>  |
| PLA2G3         | Phospholipase A2, group III                                 | ENSG00000100078 | prca vs. all normals | 1084     | 66       | 86,20494308 | 66,58203485 | 0,772369106        | 0,00440832        |
| PNPLA8         | Patatin-like phospholipase domain containing 8              | ENSG00000135241 | prca vs. all normals | 621      | 66       | 1539,682947 | 1435,238485 | 0,932164955        | 0,01749796        |
| ANXA1          | Annexin A1                                                  | ENSG00000135046 | prca vs. all normals | 1502     | 329      | 2359,575591 | 2158,634509 | 0,914840159        | 0,05191733        |
| PTGES          | Prostaglandin E synthase                                    | ENSG00000148344 | prca vs. all normals | 1502     | 329      | 299,3406136 | 278,0709301 | 0,928944879        | 0,07034606        |
| PNPLA4         | Patatin-like phospholipase domain containing 4              | ENSG00000006757 | prca vs. all normals | 1502     | 329      | 248,6895535 | 259,6085319 | 1,04390606         | 0,11949377        |
| ALOX12B        | 12R-lipoxygenase                                            | ENSG00000179477 | prca vs. all normals | 1502     | 329      | 103,1881562 | 98,61502888 | 0,955681665        | 0,24769254        |
| PTGS1          | Prostaglandin-endoperoxide synthase 1 (COX-1)               | ENSG00000095303 | prca vs. all normals | 1626     | 329      | 470,6322307 | 450,635055  | 0,957509974        | 0,38400801        |
| PLA2G2D        | Phospholipase A2, group IID                                 | ENSG00000117215 | prca vs. all normals | 1084     | 66       | 60,88093155 | 73,46130303 | 1,206638945        | 0,68394746        |

| Gene           |                                                             | ensg_id         | Tissue                   | normal n | cancer n | normal mean | cancer mean | fold change (FC)   | p-value           |
|----------------|-------------------------------------------------------------|-----------------|--------------------------|----------|----------|-------------|-------------|--------------------|-------------------|
| <b>HPGD</b>    | Hydroxyprostaglandin dehydrogenase 15-(NAD)                 | ENSG00000164120 | prca vs. normal prostate | 147      | 329      | 216,5379782 | 460,3100726 | <b>2,125770622</b> | <b>2,16E-09</b>   |
| <b>PLA2G7</b>  | Phospholipase A2, group VII                                 | ENSG00000146070 | prca vs. normal prostate | 147      | 329      | 299,968202  | 579,8321125 | 1,932978591        | <b>3,76E-14</b>   |
| PLA2G2D        | Phospholipase A2, group IID                                 | ENSG00000117215 | prca vs. normal prostate | 12       | 66       | 43,03673333 | 73,46130303 | 1,706944216        | 0,32826298        |
| PAFAH1B3       | Platelet-activating factor acetylhydrolase IB subunit gamma | ENSG00000079462 | prca vs. normal prostate | 147      | 329      | 382,2204626 | 512,7975246 | 1,341627607        | <b>1,62E-09</b>   |
| <b>PLA2G2A</b> | Phospholipase A2, group IIA                                 | ENSG00000188257 | prca vs. normal prostate | 147      | 329      | 3956,239864 | 5105,726778 | 1,290550359        | <b>0,00088234</b> |

|                |                                                             |                 |                          |     |     |             |             |             |            |
|----------------|-------------------------------------------------------------|-----------------|--------------------------|-----|-----|-------------|-------------|-------------|------------|
| CYP2J2         | Cytochrome P450 2J2                                         | ENSG00000134716 | prca vs. normal prostate | 147 | 329 | 232,9184347 | 290,443979  | 1,246977206 | 0,00029555 |
| <b>FAAH</b>    | Fatty acid amide hydrolase                                  | ENSG00000117480 | prca vs. normal prostate | 147 | 329 | 641,3767068 | 794,7888523 | 1,23919195  | 3,67E-05   |
| PTGES3         | Prostaglandin E synthase 3                                  | ENSG00000110958 | prca vs. normal prostate | 147 | 329 | 3637,354041 | 4481,046143 | 1,231952153 | 5,57E-06   |
| CYP2C9         | Cytochrome P450 2C9                                         | ENSG00000138109 | prca vs. normal prostate | 147 | 329 | 175,0565932 | 215,4017207 | 1,230469054 | 0,02050814 |
| ALOX5          | 5-lipoxygenase                                              | ENSG00000012779 | prca vs. normal prostate | 147 | 329 | 246,9453347 | 276,056972  | 1,11788697  | 0,01345451 |
| PAFAH2         | Platelet-activating factor acetylhydrolase 2                | ENSG00000158006 | prca vs. normal prostate | 147 | 329 | 215,3590218 | 230,7900131 | 1,071652402 | 0,10127299 |
| PTGES          | Prostaglandin E synthase                                    | ENSG00000148344 | prca vs. normal prostate | 147 | 329 | 261,3029075 | 278,0709301 | 1,064170823 | 0,38204557 |
| <b>EPHX2</b>   | Epoxide hydrolase 2                                         | ENSG00000120915 | prca vs. normal prostate | 147 | 329 | 795,8684245 | 840,7379292 | 1,056378044 | 0,37781672 |
| PNPLA3         | Patatin-like phospholipase domain containing 3              | ENSG00000100344 | prca vs. normal prostate | 12  | 66  | 48,42291667 | 49,59731364 | 1,024252917 | 0,86174049 |
| PTGES2         | Prostaglandin E synthase 2                                  | ENSG00000148334 | prca vs. normal prostate | 12  | 66  | 295,59875   | 299,8239273 | 1,014293624 | 0,92514247 |
| <b>ALOX15B</b> | 15-lipoxygenase 2                                           | ENSG00000179593 | prca vs. normal prostate | 147 | 329 | 815,6447497 | 819,2249897 | 1,00438946  | 0,95730338 |
| PNPLA8         | Patatin-like phospholipase domain containing 8              | ENSG00000135241 | prca vs. normal prostate | 9   | 66  | 1460,275556 | 1435,238485 | 0,982854557 | 0,76547133 |
| PNPLA4         | Patatin-like phospholipase domain containing 4              | ENSG00000006757 | prca vs. normal prostate | 147 | 329 | 265,4512558 | 259,6085319 | 0,977989466 | 0,55049625 |
| PLA2G4C        | Phospholipase A2, group IVC                                 | ENSG00000105499 | prca vs. normal prostate | 147 | 329 | 502,9571633 | 467,1265711 | 0,928760151 | 0,10803146 |
| ANXA1          | Annexin A1                                                  | ENSG00000135046 | prca vs. normal prostate | 147 | 329 | 2334,960484 | 2158,634509 | 0,924484386 | 0,20387119 |
| PLA2G4F        | Phospholipase A2, group IVF                                 | ENSG00000168907 | prca vs. normal prostate | 9   | 66  | 422,0002222 | 389,9707879 | 0,924100906 | 0,69370368 |
| PLA2G6         | Phospholipase A2, group VII                                 | ENSG00000184381 | prca vs. normal prostate | 147 | 329 | 327,8385497 | 302,4725562 | 0,922626569 | 0,15351603 |
| PLA2G4A        | Phospholipase A2, group IVA                                 | ENSG00000116711 | prca vs. normal prostate | 147 | 329 | 205,983368  | 189,817287  | 0,921517542 | 0,1585713  |
| CYP2C8         | Cytochrome P450 2C8                                         | ENSG00000138115 | prca vs. normal prostate | 147 | 329 | 101,697997  | 93,56197863 | 0,919998244 | 0,2815231  |
| ALOX12B        | 12R-lipoxygenase                                            | ENSG00000179477 | prca vs. normal prostate | 147 | 329 | 112,0283959 | 98,61502888 | 0,88026815  | 0,06229286 |
| ALOX15         | 15-lipoxygenase                                             | ENSG00000161905 | prca vs. normal prostate | 147 | 329 | 127,9557207 | 110,2872909 | 0,861917625 | 0,11825445 |
| PAFAH1B1       | Platelet-activating factor acetylhydrolase IB subunit alpha | ENSG00000007168 | prca vs. normal prostate | 147 | 329 | 739,1739184 | 614,0557872 | 0,830732487 | 2,25E-07   |
| PAFAH1B2       | Platelet-activating factor acetylhydrolase IB subunit beta  | ENSG00000168092 | prca vs. normal prostate | 12  | 66  | 163,0041833 | 131,3437591 | 0,805769253 | 0,53350665 |
| PTGS2          | Prostaglandin-endoperoxide synthase 2 (COX-2)               | ENSG00000073756 | prca vs. normal prostate | 147 | 329 | 588,178417  | 469,7278997 | 0,798614648 | 0,01204872 |
| PLA2G10        | Phospholipase A2, group X                                   | ENSG00000069764 | prca vs. normal prostate | 147 | 329 | 159,4249556 | 122,1837418 | 0,766402859 | 0,08638945 |
| ANXA2          | Annexin A2                                                  | ENSG00000182718 | prca vs. normal prostate | 147 | 329 | 2843,449163 | 2159,868897 | 0,759594694 | 0,00021643 |
| ALOX12         | 12-lipoxygenase                                             | ENSG00000108839 | prca vs. normal prostate | 147 | 329 | 200,8647497 | 142,4496012 | 0,709181683 | 0,00015034 |
| PLA2G3         | Phospholipase A2, group III                                 | ENSG00000100078 | prca vs. normal prostate | 12  | 66  | 96,49910833 | 66,58203485 | 0,689975648 | 0,18602342 |
| PLA2G4B        | Phospholipase A2, group IVB                                 | ENSG00000168970 | prca vs. normal prostate | 12  | 66  | 780,6333333 | 527,9614697 | 0,676324527 | 0,0337856  |
| PTGS1          | Prostaglandin-endoperoxide synthase 1 (COX-1)               | ENSG00000095303 | prca vs. normal prostate | 147 | 329 | 699,3113272 | 450,635055  | 0,644398335 | 1,67E-07   |
| <b>CYP4F8</b>  | Cytochrome P450 4F8                                         | ENSG00000186526 | prca vs. normal prostate | 12  | 66  | 232,3133    | 111,2718733 | 0,478973323 | 0,04537248 |

<sup>a</sup> All normal tissues <sup>24</sup>: adipose tissue, adult stem cell, bladder, blood lymphoid cell, blood myeloid cell, blood unspecified leukocyte, blood vessel, bone, bone marrow, bone marrow lymphoid cell, bone marrow myeloid cell, breast, central nervous system, cervix, circulating reticulocyte, colorectal, endocrine system, eye, gum, hair follicle, heart, hematopoietic stem cell, kidney, liver, liver and biliary system, lymphatic system, mesenchymal stem cell, mesothelium, muscle, other GI system, other urogenital system, ovary, pancreas, peripheral nervous system, placenta, prostate, respiratory system, salivary gland, skin, testis, tongue, uterus, whole blood.
