# Supplementary material
Source: PubMed Central journal article supplement (PMC3128506)

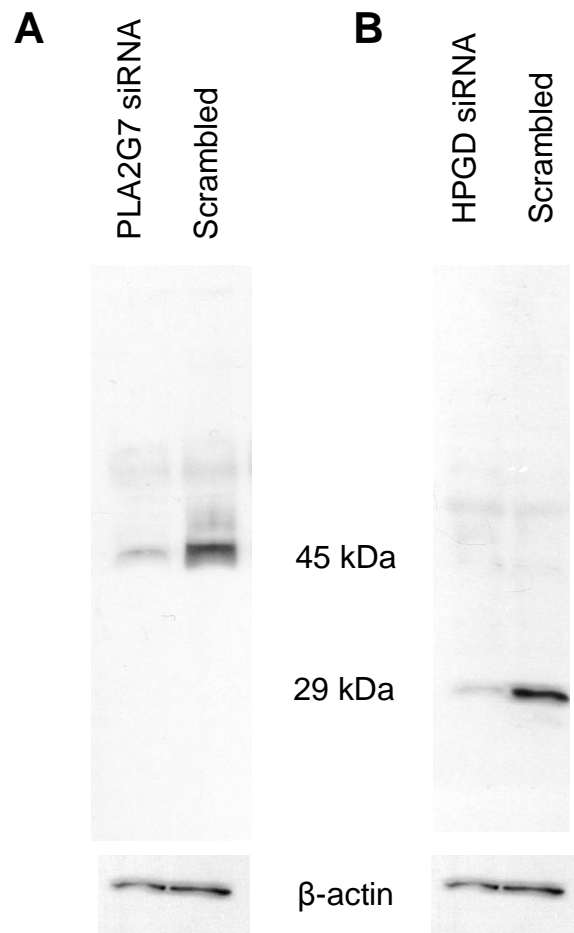

Supplement: mmc3.pdf [file mmc3.pdf]

Vainio et al., Figure S2

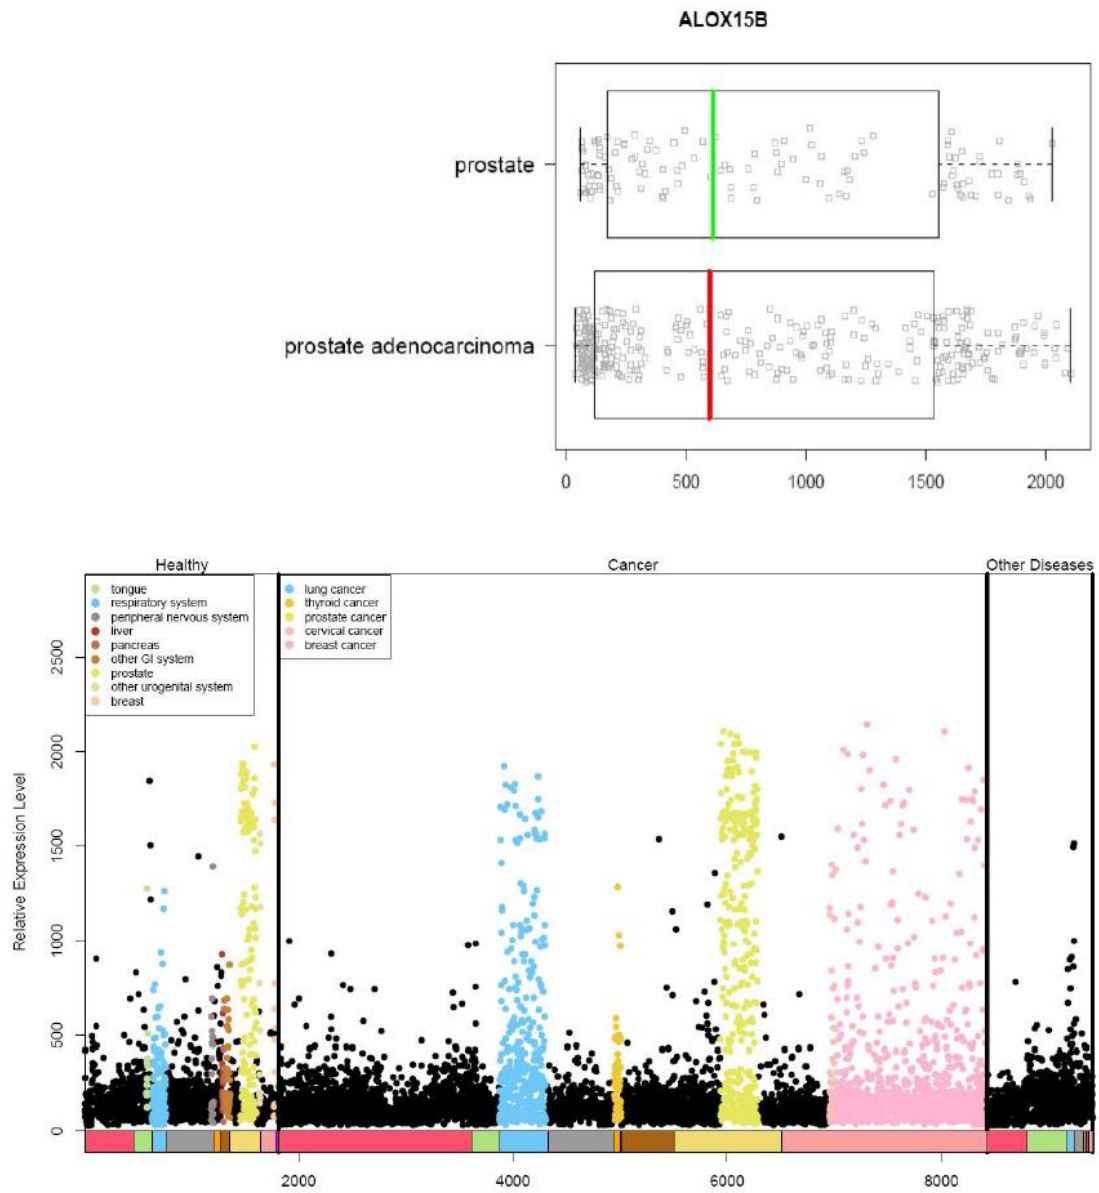

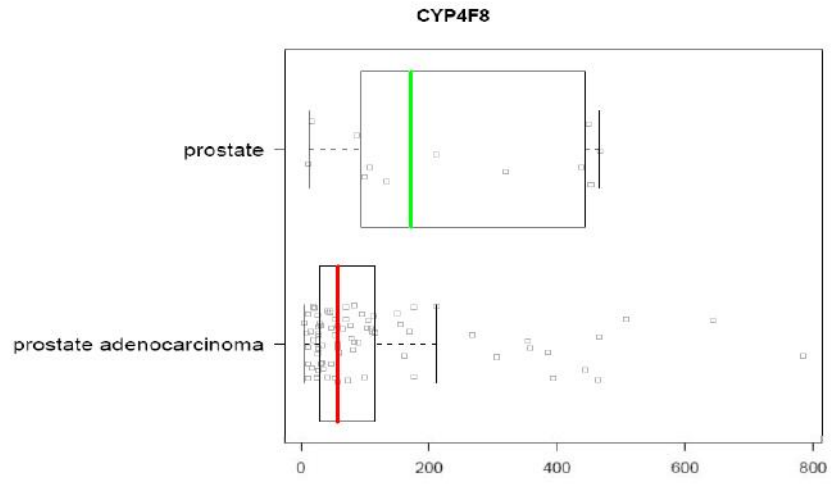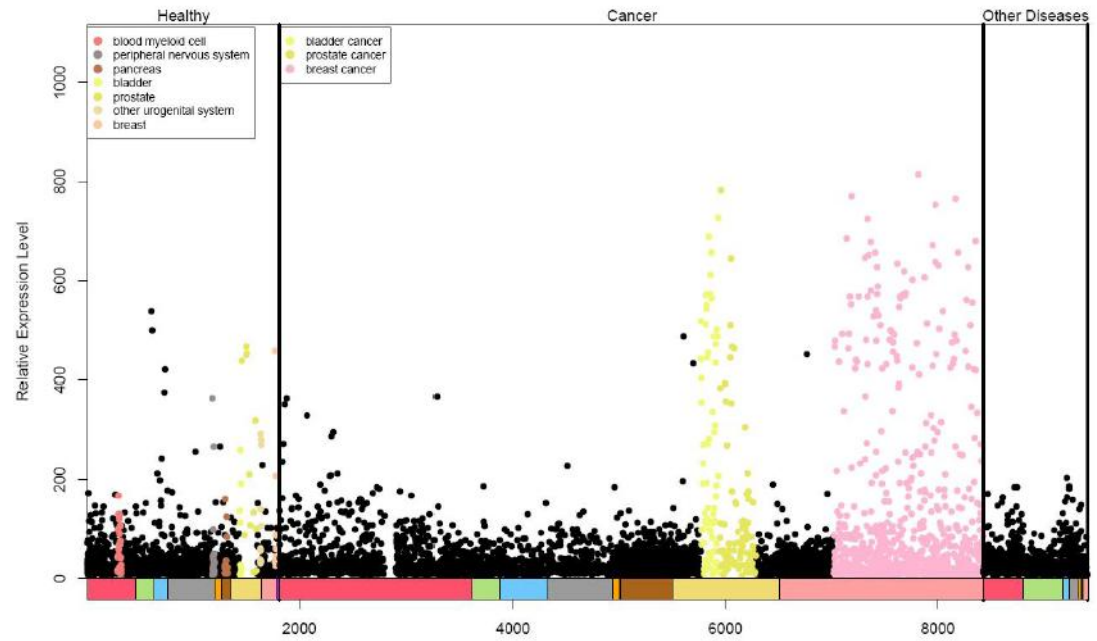

### EPHX2

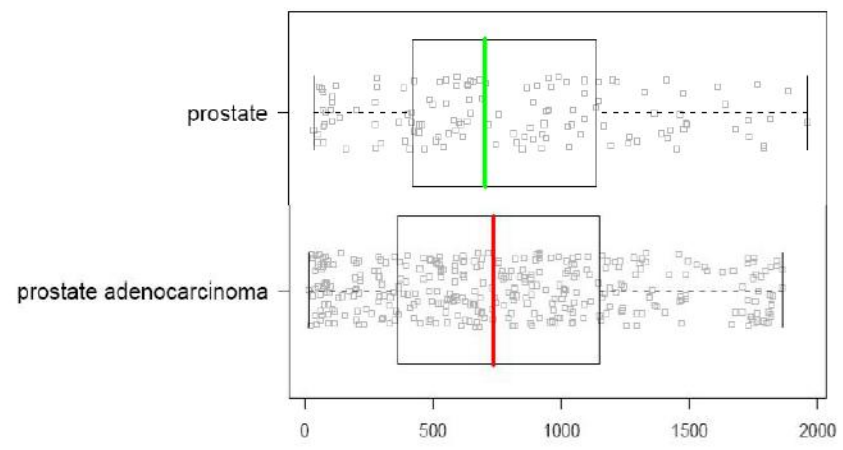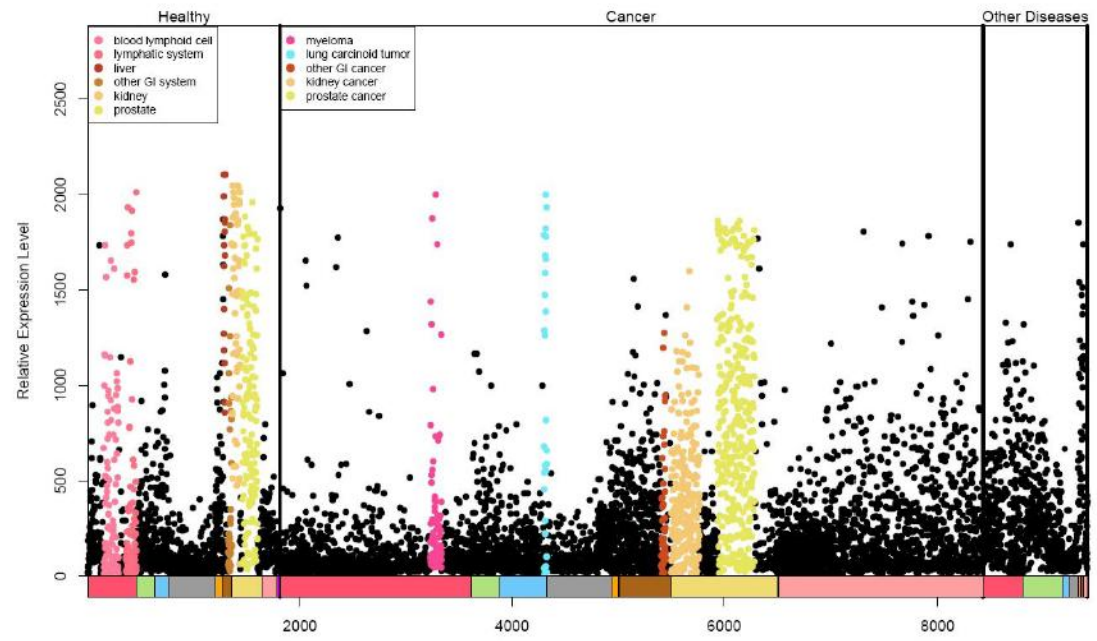

FAAH

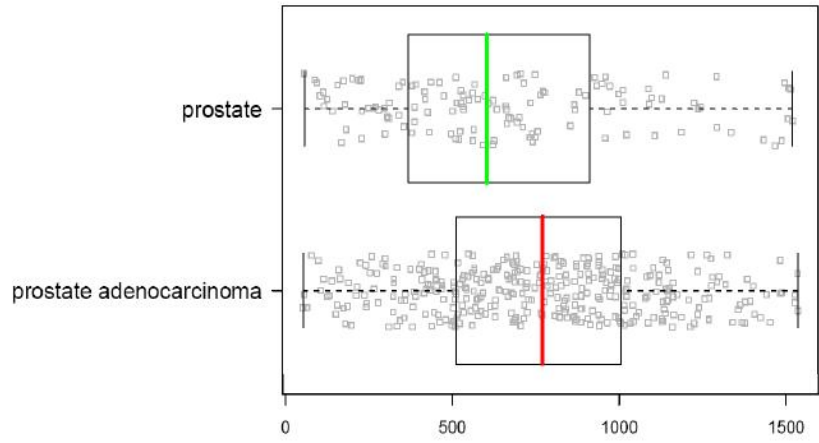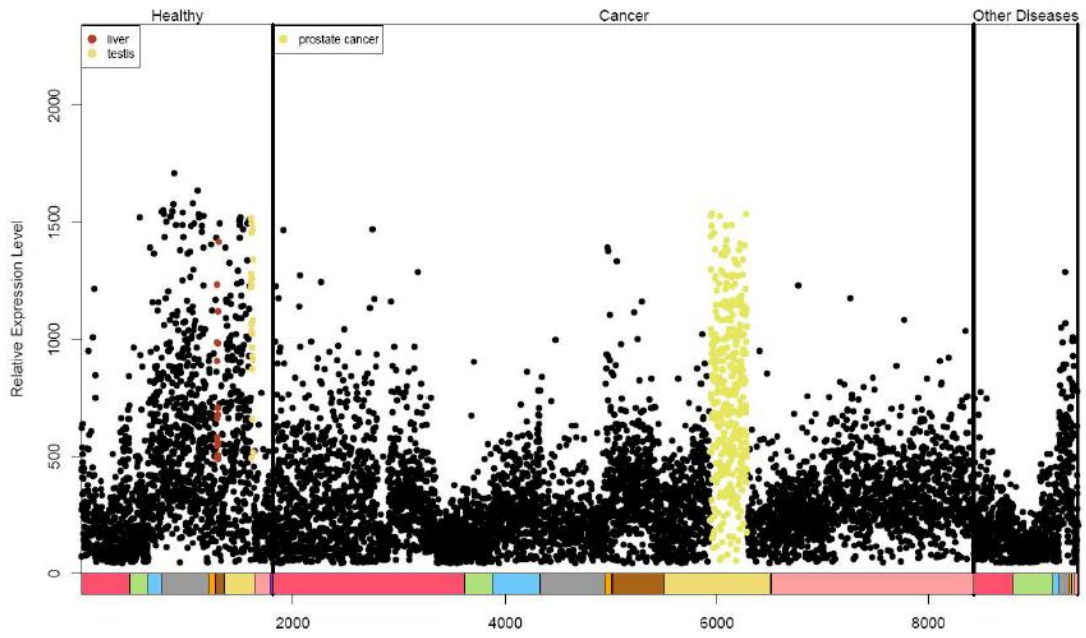

### HPGD

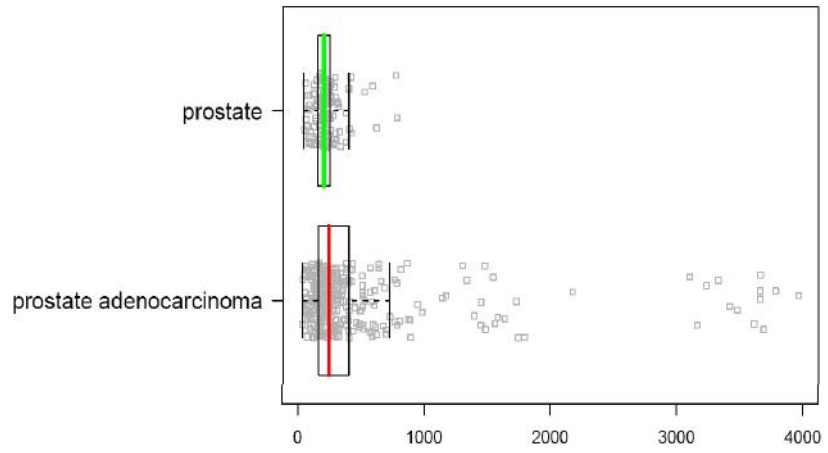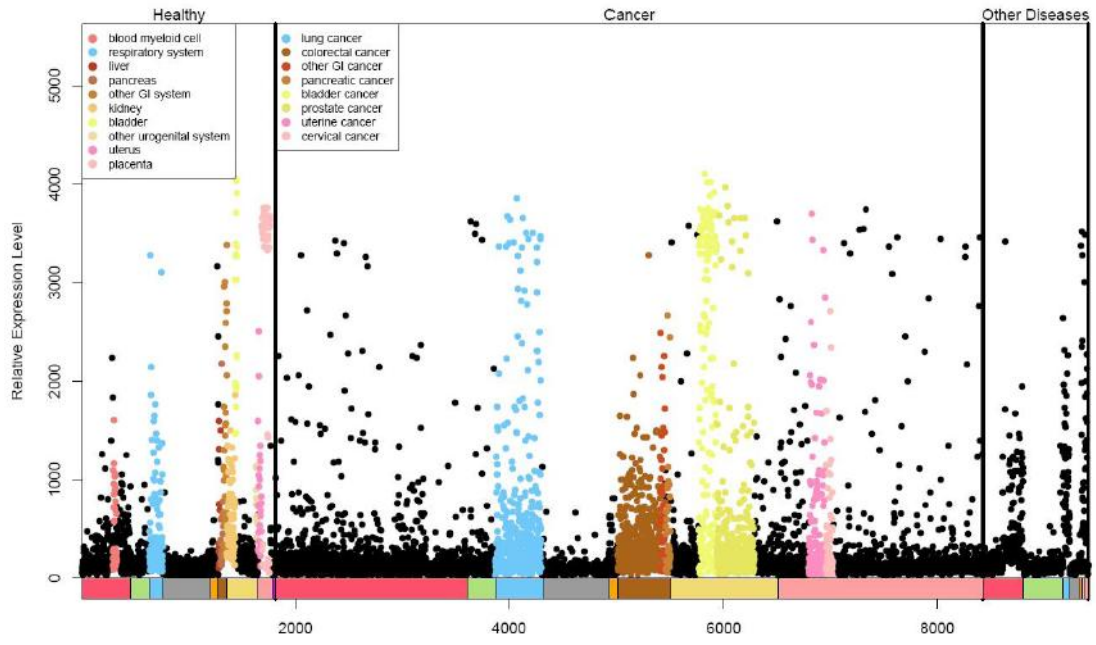

PLA2G2A

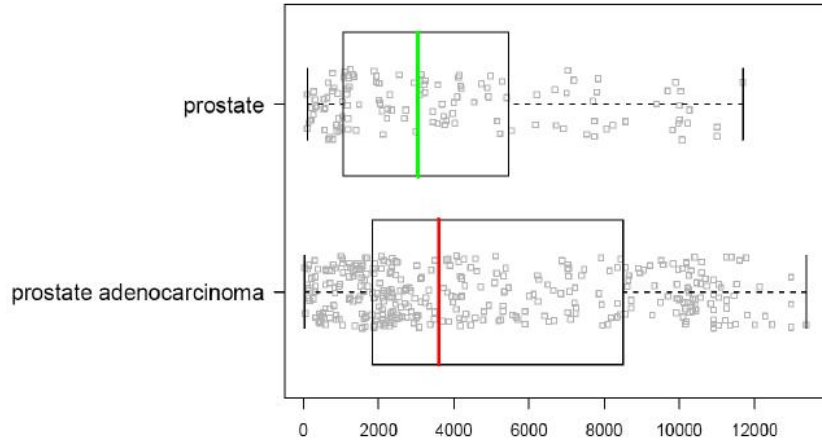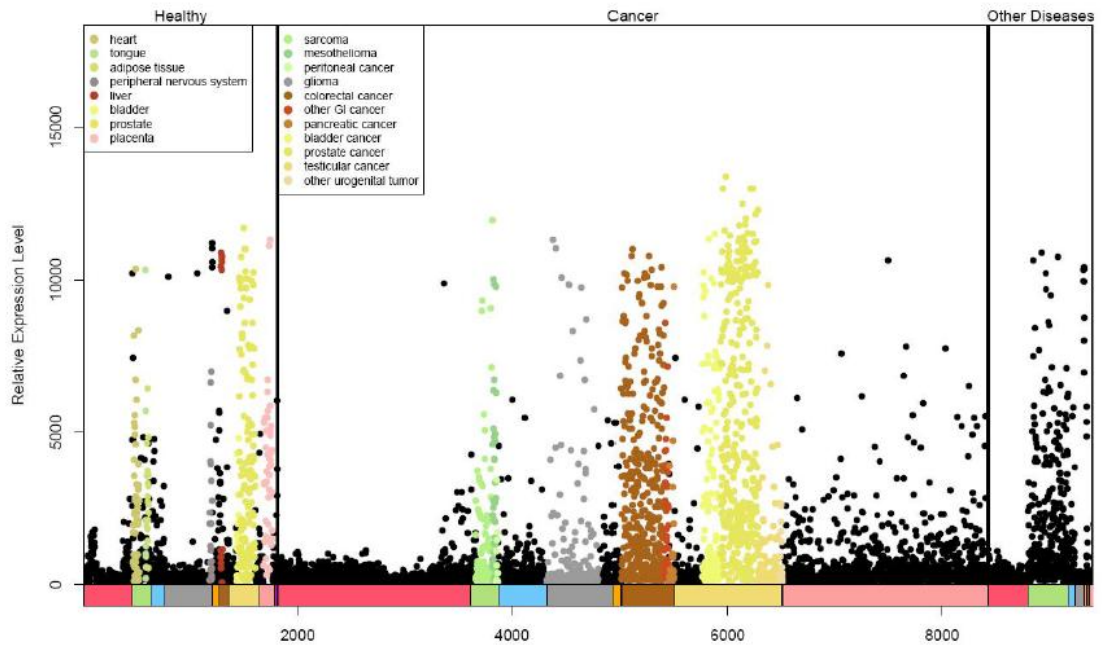

PLA2G7

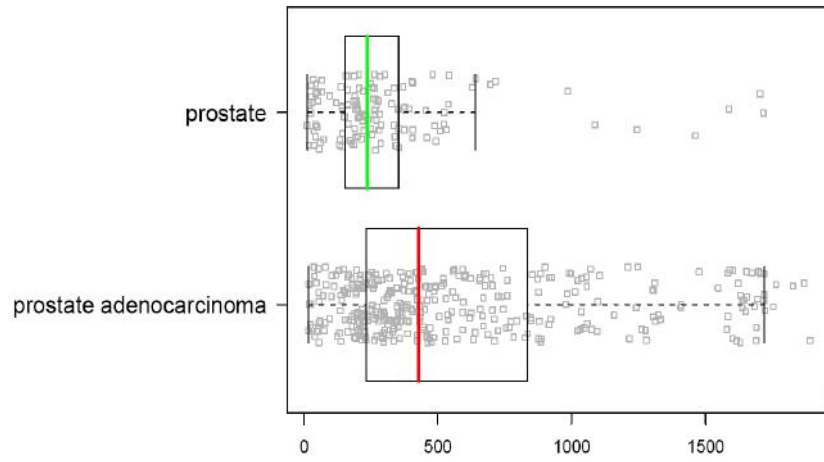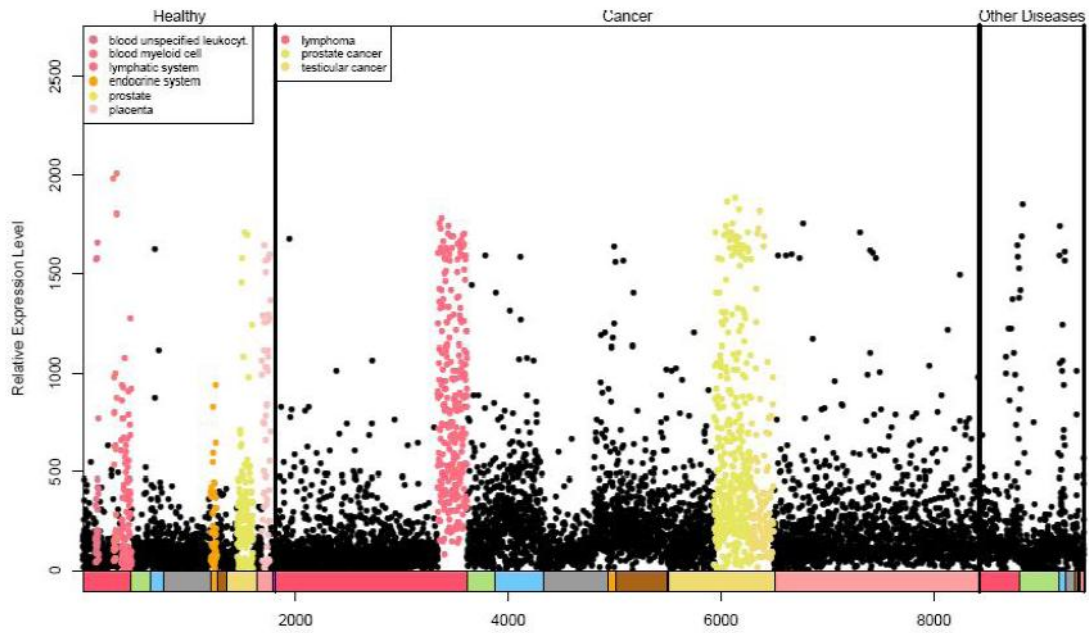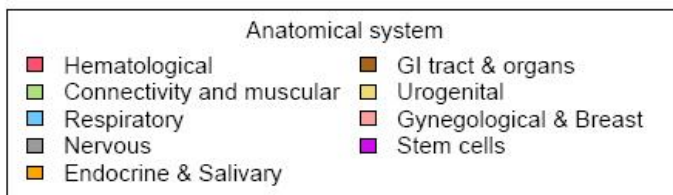

Supplement: mmc4.pdf [file mmc4.pdf]

**A**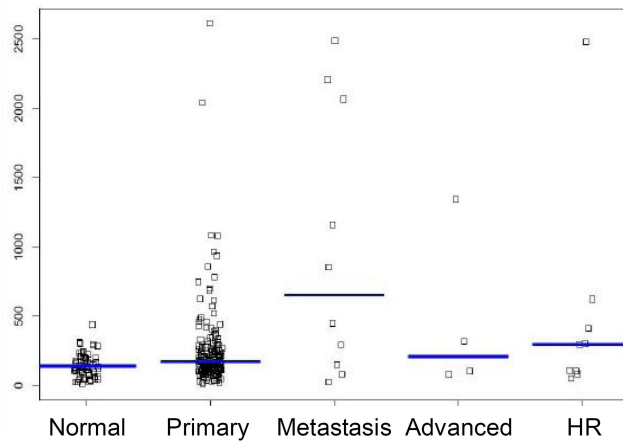**B**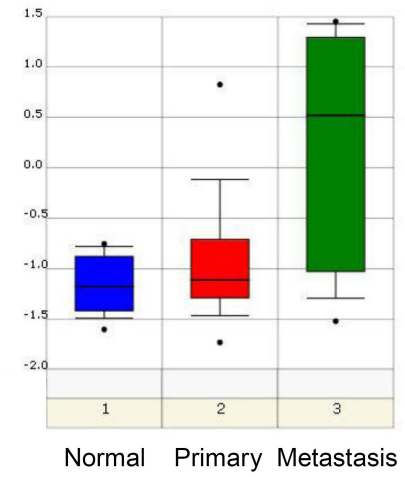

Supplement: mmc5.pdf [file mmc5.pdf]
